# Supplementary material for: Determination of the Main Ergot Alkaloids and Their Epimers in Oat-Based Functional Foods by Ultra-High Performance Liquid Chromatography Tandem Mass Spectrometry
Source: MDPI journal article supplement (doi:10.3390/molecules26123717), 2021-06-18

## **SUPPLEMENTARY MATERIAL**

### **DETERMINATION OF THE MAIN ERGOT ALKALOIDS AND THEIR EPIMERS IN OAT-BASED FUNCTIONAL FOODS BY ULTRA-HIGH PERFORMANCE LIQUID CHROMATOGRAPHY TANDEM MASS SPECTROMETRY**

Laura Carbonell-Rozas, Laura Gámiz-Gracia, Francisco J. Lara, Ana M. García-Campaña\*.

Department of Analytical Chemistry, Faculty of Sciences, University of Granada

Avda. Fuente Nueva s/n, 18071, Granada, Spain

\*Corresponding author: [amgarcia@ugr.es](mailto:amgarcia@ugr.es)

**Table S1.** MS parameters for the different target analytes studied in the proposed UHPLC-MS/MS method.

|             | Precursor ion<br>(m/z) | Molecular ion                       | DP <sup>a</sup> | EP <sup>a</sup> | Product ions <sup>b</sup> | CE <sup>a</sup> | CXP <sup>a</sup> |
|-------------|------------------------|-------------------------------------|-----------------|-----------------|---------------------------|-----------------|------------------|
| <b>Em</b>   | 326.0                  | [M+H] <sup>+</sup>                  | 51              | 5.0             | 223.0 (Q)                 | 23              | 4.0              |
|             |                        |                                     |                 |                 | 208.1 (I)                 | 37              | 4.0              |
| <b>Emn</b>  | 326.0                  | [M+H] <sup>+</sup>                  | 46              | 6.0             | 208.1 (Q)                 | 39              | 6.0              |
|             |                        |                                     |                 |                 | 223.1 (I)                 | 33              | 6.0              |
| <b>Es</b>   | 548.2                  | [M+H] <sup>+</sup>                  | 61              | 5.0             | 208.2 (Q)                 | 57              | 4.0              |
|             |                        |                                     |                 |                 | 223.1 (I)                 | 45              | 8.0              |
| <b>Esn</b>  | 530.2                  | [M-H <sub>2</sub> O+H] <sup>+</sup> | 66              | 6.5             | 223.2 (Q)                 | 37              | 6.0              |
|             |                        |                                     |                 |                 | 263.1 (I)                 | 33              | 6.0              |
| <b>Et</b>   | 582.2                  | [M+H] <sup>+</sup>                  | 56              | 7.0             | 208.2 (Q)                 | 55              | 4.0              |
|             |                        |                                     |                 |                 | 223.2 (I)                 | 45              | 4.0              |
| <b>Etn</b>  | 564.2                  | [M-H <sub>2</sub> O+H] <sup>+</sup> | 66              | 6.0             | 223.0 (Q)                 | 41              | 6.0              |
|             |                        |                                     |                 |                 | 297.1 (I)                 | 33              | 6.0              |
| <b>Eco</b>  | 562.2                  | [M+H] <sup>+</sup>                  | 46              | 4.5             | 268.1 (Q)                 | 33              | 6.0              |
|             |                        |                                     |                 |                 | 208.2 (I)                 | 55              | 4.0              |
| <b>Econ</b> | 544.2                  | [M-H <sub>2</sub> O+H] <sup>+</sup> | 61              | 8.5             | 277.1 (Q)                 | 31              | 6.0              |
|             |                        |                                     |                 |                 | 223.1 (I)                 | 37              | 6.0              |
| <b>Ekr</b>  | 576.2                  | [M+H] <sup>+</sup>                  | 86              | 6.0             | 208.3 (Q)                 | 59              | 6.0              |
|             |                        |                                     |                 |                 | 268.1 (I)                 | 31              | 6.0              |
| <b>Ekrn</b> | 576.2                  | [M-H <sub>2</sub> O+H] <sup>+</sup> | 36              | 7.0             | 223.0 (Q)                 | 45              | 6.0              |
|             |                        |                                     |                 |                 | 558.0 (I)                 | 21              | 6.0              |
| <b>Ecr</b>  | 610.2                  | [M+H] <sup>+</sup>                  | 56              | 6.5             | 268.2 (Q)                 | 35              | 6.0              |
|             |                        |                                     |                 |                 | 208.1 (I)                 | 57              | 6.0              |
| <b>Ecrn</b> | 592.2                  | [M-H <sub>2</sub> O+H] <sup>+</sup> | 71              | 7.5             | 305.1 (Q)                 | 33              | 4.0              |
|             |                        |                                     |                 |                 | 223.2 (I)                 | 39              | 6.0              |

<sup>a</sup> Declustering potential (DP), Entrance potential (EP), Collision Cell Exit Potential (CXP) and Collision Energy (CE). All expressed in voltage.

<sup>b</sup> Product ions: (Q) Transition used for quantification, (I) Transition employed to confirm the identification.

**Figure S1.** Identification of 12 EAs.

Ergometrine (Em)

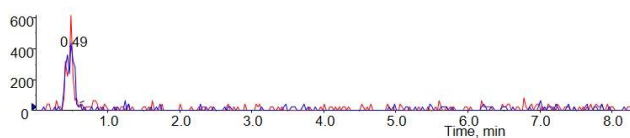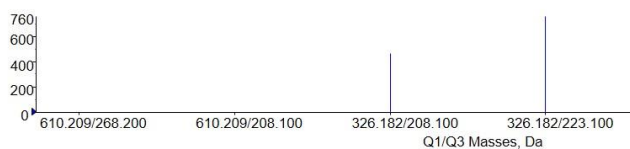

Ergometrinine (Enn)

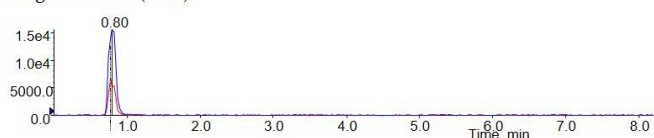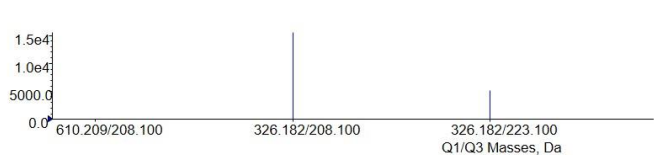

Ergosinine (Es)

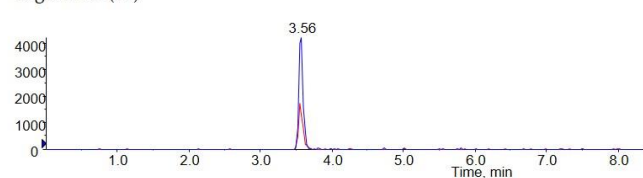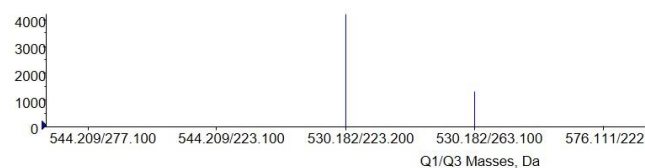

Ergosinine (Es)

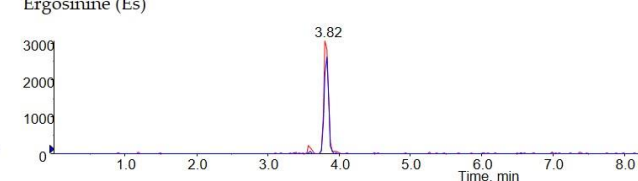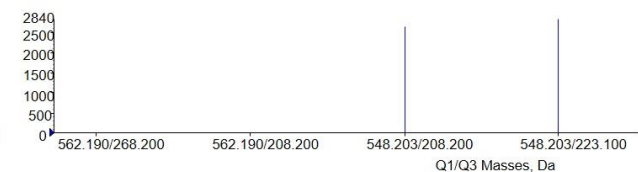

Ergotamine (Etn)

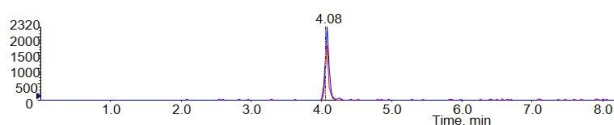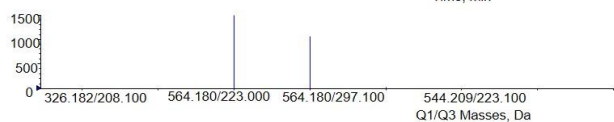

Ergocornine (Eco)

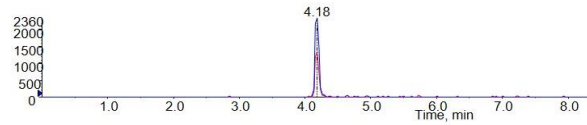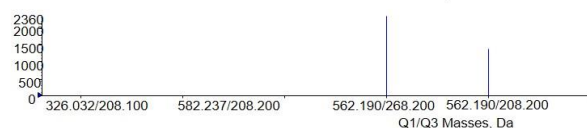

Ergotamine (Et)

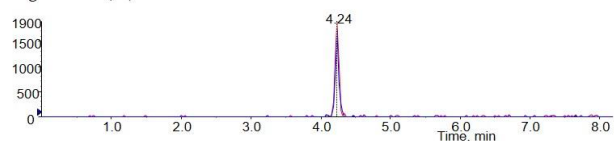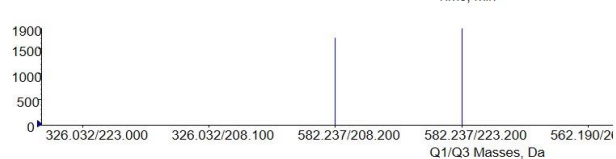

Ergocorninine (Econ)

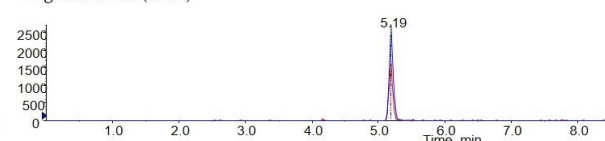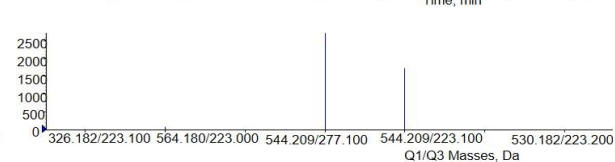

**Figure S1.** Identification of 12 EAs.

Ergokryptine (Ekr)

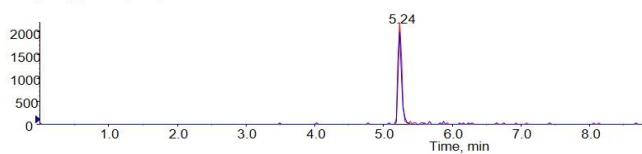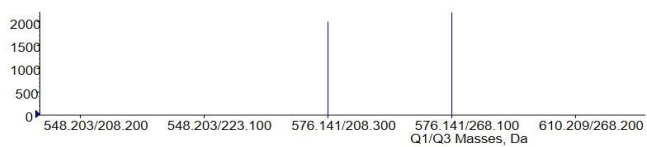

Ergocristine (Ecr)

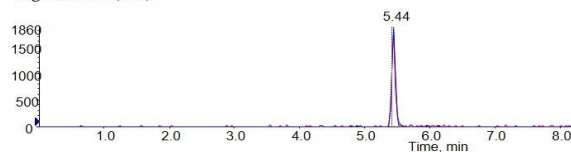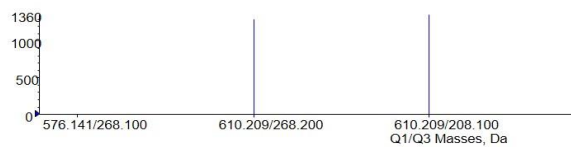

Ergokryptinine (Ekm)

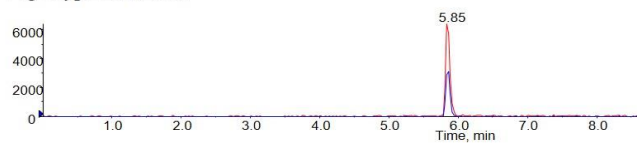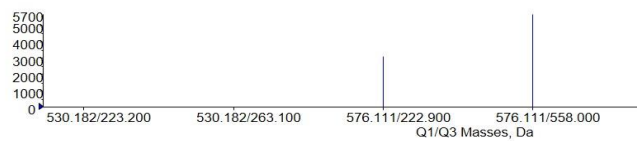

Ergocristinine (Ecm)

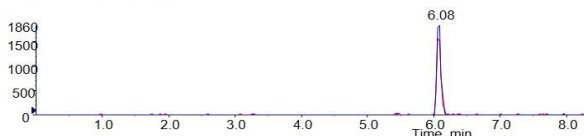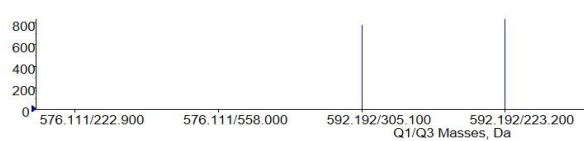

Supplement: s1 [file s1]
